# Supplementary material for: SARS-CoV-2 Seroprevalence Among Antenatal Clinic Attendees in Kingston, Jamaica, September-November 2020
Source: bioRxiv or medRxiv preprint supplement (doi:10.1101/2021.02.08.21251367), 2021-02-11
Supplement: Supplementary file [file media-1.pdf]

### Prevalence adjusted for sensitivity and specificity of test

Let  $s$  = sensitivity = probability of true +,  $f$  = probability of false +.

Then, specificity  $\sigma = 1 - f$ . Sensitivity- and specificity-adjusted prevalence =  $t$ .

Probability  $p$  of + test result (= weighted prevalence):

$$p = \text{Pr}(\text{true } +) + \text{Pr}(\text{false } +) = ts + (1 - t)f.$$

Solve for  $t$ :

$$t = \frac{p - f}{s - f} = \frac{p + \sigma - 1}{s + \sigma - 1}.$$

In terms of percentages ( $\rho = 100t\%$ ,  $S = 100s\%$ ,  $Sp = 100\sigma\%$ ,  $\pi = 100p\%$ ),

$$\rho = \frac{\pi + Sp - 100\%}{S + Sp - 100\%} \times 100\%.$$

### Seroreversion-adjusted prevalence

The vector  $d[n] = \rho[n] - \rho[n - 1] = r[n] - s[n]$ , the difference between the fractions or %'s measured (*i.e.*, uncorrected for seroreversion) SARS-CoV-2 PCR confirmed *per capita* in months  $n$  and  $n - 1$  ( $d[n]$  could be positive or negative), is related to the *actual* fraction or % new recoveries *per capita* in month  $n$ ,  $r[n]$ , by the equation (Buss et al.)

$$d[n] = r[n] - \frac{p(1 - \alpha)}{\alpha} \sum_{k=1}^{n-1} r[k] \alpha^{n-k},$$

or, in matrix notation,  $\mathbf{d} = \mathbf{A}\mathbf{r}$ , with the matrix elements of  $\mathbf{A}$  given in terms of the model parameters  $\alpha$  (decay rate, or monthly attenuation factor) and  $p$  (proportion which sero-reverted) by

$$A_{i,j} = \begin{cases} 1 & i = j \\ -\frac{p(1 - \alpha)}{\alpha} \alpha^{i-j} & i > j \\ 0 & i < j \end{cases}$$

( $i, j = 1, \dots, M$ ).

We are interested in the inverse relation,  $\mathbf{r} = \mathbf{A}^{-1}\mathbf{d}$ .

The (triangular) matrix  $\mathbf{A}$  can be inverted. The elements of  $\mathbf{A}^{-1}$  are found to be given by

$$(A^{-1})_{ij} = \begin{cases} 1 & i=j \\ \frac{(\alpha + p(1-\alpha))^{i-j}}{1 + \frac{\alpha}{p(1-\alpha)}} & i > j \\ 0 & i < j \end{cases}$$

Hence, the corrected prevalence *per capita* follows from the measured one as

$$r[n] = d[n] + \left(1 + \frac{\alpha}{p(1-\alpha)}\right)^{-1} \sum_{k=1}^{n-1} d[k] (\alpha + p(1-\alpha))^{n-k}.$$

The ‘cost function’ proposed by Buss et al. is defined as

$$J(\alpha, p) = r[M] + r[M-1]$$

and is to be minimised w.r.t. the two independent variables  $\alpha$  and  $p$ , both of which are in the range  $[0, 1]$ .

Substitution for the  $r$  values from the previous equation yields

$$J(\alpha, p) = d[M] + d[M-1] + \left(1 + \frac{\alpha}{p(1-\alpha)}\right)^{-1} \left[ \sum_{k=1}^{M-1} d[k] (\alpha + p(1-\alpha))^{M-k} + \sum_{k=1}^{M-2} d[k] (\alpha + p(1-\alpha))^{M-k-1} \right].$$

We may now define two new independent variables,

$$x \equiv \alpha + p(1-\alpha) \text{ and } y \equiv \left(1 + \frac{\alpha}{p(1-\alpha)}\right)^{-1},$$

and consider  $J$  to be a function of  $x$  and  $y$  instead, and minimize it w.r.t. these new variables (which are also both in the range  $[0, 1]$ ). Now, the square-bracket factor is a function of  $x$  alone, call it  $f(x)$ , so  $J$  is of the form

$$J(x, y) = \text{constant} + yf(x).$$

If there is a (global) minimum, it should occur where  $\partial J / \partial x = 0$  and  $\partial J / \partial y = 0$ , producing two simultaneous equations in  $x$  and  $y$ , the solution of which can then be transformed back to  $\alpha$  and  $p$ . However, applying it to  $J$  as given, these criteria lead to  $f(x) = 0$  and  $df(x)/dx = 0$  (since  $y \neq 0$ ), which cannot be satisfied for any single value of  $x$  (*i.e.* the problem is over-determined).
